# Supplementary material for: Physicochemical Characterization of Air Pollution Particulate Matter (PM2.5 and PM>2.5) in an Urban Area of Cotonou, Benin
Source: MDPI journal article supplement (doi:10.3390/atmos14020201), 2023-01-18
Supplement: s1 [file s1]

Archive with 1 entries (1 files):
- atmosphere-2093722-supplementary.pdf
